# Supplementary material for: Maturation of Human Embryonic Stem Cell–Derived Pancreatic Progenitors Into Functional Islets Capable of Treating Pre-existing Diabetes in Mice
Source: PubMed Central journal article supplement — Diabetes. 2012 Jul 17;61(8):2016–29. doi: 10.2337/db11-1711 (PMC3402300; doi:10.2337/db11-1711), 2012-07-17

## SUPPLEMENTARY DATA

### ***In vitro differentiation optimization***

The effect of various basal media formulations were examined during stages 3 – 4 of the differentiation protocol. For these studies, conditions were as described for the final protocol above, but no PKC activator was added during stage 4. All media was obtained from Invitrogen: Dulbecco's Modified Eagle Medium - High Glucose (DMEM HG; #10569044), F10 Nutrient Mixture (F10; #12390-035), Medium 199 (M199; #12350-039), Iscove's Modified Dulbecco's Medium (IMDM; #31980-030), Advanced RPMI 1640 (Adv RPMI; #12633-012), F12 Nutrient Mixture (F12; #31765-035), CMRL Medium-1066 (CMRL; #11530-037), Modified IMEM (IMEM; #A10488), Standard RPMI 1640 (RPMI; #22400) and DMEM/F-12 - High Glucose (DMEMF12; #11330057). All experiments were performed in triplicate, with the exception of DMEM-HG, F10 and RPMI, which were performed in duplicate. The role of HEPES in the development of pancreatic progenitor cells was examined by adding HEPES (Invitrogen) to DMEM-HG during stages 3 – 4 of the differentiation protocol at a final concentration of 0, 5, 10 or 15 mM (n = 2 per concentration).

The effect of PKC activators was also tested at stage 4, with or without Noggin and Alk5i (n = 2 for all conditions). Two different PKC activators were examined: TPB ((2S,5S)-(E,E)-8-(5-(4-(Trifluoromethyl)phenyl)-2,4-pentadienoylamino)benzolactam) and PBDu (Phorbol-12,13-dibutyrate), (EMD Chemicals Inc). For the initial experiments with and without Noggin / ALK5i, both PKC activators were used at a concentration of 20 nM. The optimal concentration of TPB was then further examined in a dose titration study (0, 31.2, 62.5, 125, 250 and 500 nM).

The *in vivo* development of hESCs was also examined following differentiation with or without ALK5i included in the S4 media (i.e. Basal S4 media with Noggin/TPB +/- ALK5i). Similarly, *in vivo* maturation of cells was also examined following differentiation in either "Basal S4 Media" (i.e. DMEM-HG media, no additional factors; n = 4) or "Basal S4 + 3 factors" (i.e. DMEM-HG + ALK5i, Noggin and TPB; n = 5). In both studies, cells were transplanted under the kidney capsule of SCID-beige mice and human C-peptide was assessed monthly in random fed plasma samples.

The high fraction of pancreatic endoderm generated using the optimized protocol with the H1 line (Fig 2A) is also highly dependent on the quality of small molecules used along with the cell density of cultures at the end of stage 1. Reagents such as RA are highly labile and should be used with minimal exposure to light or air when preparing aliquots. Furthermore, at end of stage 1 an approximate cell density of  $\sim 5\text{-}6 \times 10^5$  cells/cm<sup>2</sup> generated highly uniform pancreatic endoderm at stage 4 (Supp Fig 4B).

### ***Flow Cytometry***

hESC-derived cells were released into single-cell suspension by incubation in TrypLE Express (Invitrogen No. 12604) at 37°C for 3-5 minutes. Cells were then washed twice in staining buffer (PBS containing 0.2% BSA) (BD Biosciences, No. 554657). For surface marker staining,  $1 \times 10^5$  to  $1 \times 10^6$  cells were re-suspended in 100  $\mu$ l blocking buffer (0.5% human gamma-globulin diluted 1:4 in staining buffer). Directly conjugated primary antibodies (CD184/CXCR4 APC (Allophycocyanin, BD No. 555976)) were added to the cells at a final dilution of 1:20 and incubated for 30 min at 4°C. Stained cells were washed twice in BD staining buffer, re-suspended in 200  $\mu$ l staining buffer, followed by incubation in 15  $\mu$ l of 7AAD for live/dead discrimination prior to analysis on the BD FACS Canto II.

For intracellular antibody staining, cells were first incubated with Green Fluorescent LIVE/DEAD cell dye (Invitrogen, No.L23101) for 20 min at 4°C to allow for live/dead cell discrimination during analysis, followed by a single wash in cold PBS. Cells were fixed in 250  $\mu$ l of Cytofix/Cytoperm Buffer (BD, No. 554722) for 20 min at 4°C followed by two washes in BD Perm/Wash Buffer Solution (BD, No. 554723). Cells were re-suspended in 100  $\mu$ l staining/blocking solution consisting of Perm

## SUPPLEMENTARY DATA

wash buffer with 2% normal goat serum (or appropriate species of the secondary antibody). Cells were then incubated for 30 min at 4°C with primary antibodies at empirically pre-determined dilutions followed by two washes in Perm/Wash buffer. Lastly, cells were incubated with the appropriate secondary antibodies for 30 min at 4°C followed by two washes prior to analysis on the BD FACS Canto II. The following concentrations of primary antibodies were used: rabbit anti-insulin (1:100; Cell Signaling C27C9; Danvers, MA), or mouse anti-insulin (1:100; Abcam, Cambridge, MA), mouse anti-glucagon (1:1250; G2654 Sigma-Aldrich, St Louis, MO), rabbit anti-synaptophysin (1:100; Dako A0010; Carpinteria, CA), rabbit anti-chromogranin A (1:800; Dako), mouse anti-NKX6.1 (1:50; DSHB, University of Iowa); mouse anti-CDX2 (1:250; Invitrogen); goat anti-NeuroD (1:500; R&D Systems), mouse anti-PDX1 (1:20; BD No. 562161), mouse NKX2.2 (1:100; DSHB, University of Iowa, Cat#74.5A5), mouse Oct3/4 (1:20; BD Cat# 560329) and goat SOX17 (1:20; R&D Systems, Cat# IC1924A). The antibodies for pancreas markers were all tested for specificity using human islets or where appropriate undifferentiated H1 cells as a positive control. For secondary antibodies, goat anti-mouse Alexa 647 (1:500; Invitrogen), goat anti-rabbit PE (1:200; Invitrogen) or donkey anti-goat Alexa 647 (1:800; Invitrogen) were added and incubated for 30 min at 4°C followed by a final wash in Perm Wash buffer. Cells were analyzed on BD FACS Canto II using the BD FACS Diva Software with at least 30,000 events being acquired.

### ***High Content Image Analysis***

For quantitative analysis of expression of intracellular markers, cells grown on 6-well culture plates were rinsed with PBS (-/-) to remove residual medium and fixed in 4% PFA for 15 min at room temperature. Cells were then permeabilized in 0.5% Triton X-100 for 20 min at RT followed by blocking for 30 min in serum from the same species as the secondary antibody. Primary antibodies were added at pre-determined dilutions followed by overnight incubation at 4°C (Supplementary Table 2; all antibodies were commercially available except for rabbit NKX6.1, which was custom-made by LifeSpan (Biosciences, Seattle WA). Cells were then washed at least twice in PBS and secondary antibodies diluted in serum were added and incubated for 45 minutes at 4°C. Cells were washed and incubated in Hoechst 33342 at 10 µg/ml in PBS for nuclear counterstain. Images were acquired and analyzed using the IN Cell Analyzer 1000 (INCA1000; GE Healthcare, Piscataway, NJ) and using the Developer Software (GE Healthcare). A list of primary and secondary antibodies used is provided in Supplementary Table 2. For each marker, at least  $5 \times 10^5$  cells representing 100 randomly selected fields in a well of a 6-well plate were analyzed. A minimum of two wells was used per marker and averages representing three independent experiments were reported.

### ***Quantitative RT-PCR***

#### ***Cultured Cells***

Gene expression was analyzed at various stages of differentiation. Total RNA was extracted with the RNeasy Mini Kit (Qiagen; Valencia, CA) and reverse-transcribed using a High Capacity cDNA Reverse Transcription Kit (Applied Biosystems, Foster City, CA) according to manufacturer's instructions. cDNA (100-120 ng) was amplified by PCR using Taqman Universal Master Mix and Taqman Gene Expression Assays which were pre-loaded onto custom Taqman Arrays (Applied Biosystems). Data were analyzed using Sequence Detection Software (Applied Biosystems) and normalized to undifferentiated hESCs using the  $\Delta\Delta C_t$  method. In our experience not all ES cells in culture are undifferentiated. We routinely find that 0.5-1% of cells are spontaneously differentiating. Thus, not all of the genes are "off", but rather are expressed at very low levels, making undifferentiated hESCs a suitable control for gene expression. A list of primers (Applied Biosystems) is provided in Supplementary Table 3.

## SUPPLEMENTARY DATA

### *Engrafted Cells*

A small piece of the engrafted cells ( $n = 3$ ), harvested 34 weeks after transplantation, was dissected away from the kidney prior to fixation, immediately immersed in RNAlater (Qiagen) and stored at 4°C. The tissue was homogenized in Buffer RLT (Qiagen) using a rotor-type tissue homogenizer. RNA extraction was then performed using the RNeasy kit (Qiagen) with on-column DNase digestion as described in the manufacturer's instructions. cDNA synthesis was performed using the RT2 first strand cDNA synthesis kit and mRNA levels measured using a custom designed PCR array (primers provided in Supplementary Table 4; SA Biosciences, Frederick, MD) run on a StepOne Plus Real Time PCR machine (Applied Biosystems). Data analysis was performed using the online RT2 Profiler PCR Array Data Analysis Tool (SA Biosciences). Gene expression is presented as the fold change relative to adult human islets ( $n = 3$ ).

### *In Vivo Analysis of Transplanted Cells*

All metabolic analyses were performed in conscious, restrained mice on the indicated days. Routine blood glucose measurements were taken following a 4 h morning fast. For monthly meal challenges, animals were fasted overnight (16 h) prior to initial blood glucose testing and blood collection; mice were then provided with normal chow for a 45 min feeding period, after which blood glucose was assessed and blood collected again. All other metabolic tests were performed following a 4 h morning fast and the Linbit insulin pellet was explanted from STZ-treated mice at least one week prior to the procedure, so that there was no contribution from exogenous insulin. For the glucose tolerance test (GTT) at 12 and 25 weeks post-transplant, 1.5 g/kg of glucose (30% solution; Vétoquinol, Lavaltrie, QC) prepared in water was delivered by i.p. injection. In addition, a 2 g/kg glucose challenge was provided by i.p. injection at 32 weeks and by oral gavage at 34 weeks post-transplant. For all tests, blood glucose was tested via saphenous vein, and saphenous blood samples were collected at the indicated time points using heparinized microhematocrit tubes. Plasma was stored at -30°C and later assayed using a human and/or mouse C-Peptide ELISA (Alpco Diagnostics; Salem, NH).

For nude rats, plasma was collected following an i.p. glucose injection (2 g/kg) at the indicated times post-transplant for human C-peptide measurements. At 14-weeks post-transplant, an i.p. GTT (2 g/kg glucose) was performed; blood glucose and human C-peptide was measured in the plasma at the indicated times following the glucose challenge.

### *Immunofluorescent Image Quantification*

To quantify the hESC-derived endocrine cells, pre-transplant clusters ( $n = 3$ ) and post-transplant kidney graft sections from mice at 1 month ( $n = 4$ ), 3 months ( $n = 3$ ) and 8 months ( $n = 4$ ) post-transplant were co-immunostained for synaptophysin (endocrine marker) with either insulin and glucagon, or somatostatin and pancreatic polypeptide. Whole slide fluorescence scanning was performed using the ImageXpress<sup>MICRO</sup><sup>TM</sup> Imaging System (Molecular Devices Corporation, Sunnyvale, CA). Individual images were stitched together to recreate the entire engrafted kidney section and then quantified using MetaXpress software. The endocrine fraction was determined as the number of synaptophysin-positive cells relative to the total number of hESC-derived cells (defined as cells within the engrafted region of the kidney). Within the endocrine compartment, the number of synaptophysin-positive cells that co-expressed each of the four main pancreatic hormones was determined (e.g. number of insulin/synaptophysin co-positive cells relative to total number of synaptophysin-positive cells). Finally, insulin and glucagon co-expressing cells were assessed by measuring the area of insulin-positive, glucagon-positive and insulin/glucagon co-positive immunostaining relative to the total insulin and/or glucagon-positive area.

## SUPPLEMENTARY DATA

Endogenous pancreatic  $\beta$ -cell area was also assessed in healthy control mice ( $n = 3$ ) and compared to mice at 8 ( $n = 4$ ) and 34 ( $n = 4$ ) weeks following STZ treatment. Pancreas sections were immunostained for insulin and glucagon. After whole slide fluorescence scanning, pancreas images were stitched together as described above. Insulin-positive area was expressed relative to the whole pancreas area; at least two sections were quantified per animal, separated by at least 200  $\mu$ M.

### *Statistical Analysis*

All statistics were performed using GraphPad Prism software (GraphPad Software Inc., La Jolla, CA). For long-term meal challenge tracking (Fig 3C-D, Supplementary Fig 8A), 1-way repeated-measures ANOVA (SNK post-hoc) was used to compare human C-peptide: a) fasted levels over time and b) fed levels over time. Paired t-test was used to compare fed vs fasted C-peptide levels at each time point (Fig 3C and Supplementary Fig 8B). AUC for the glucose and C-peptide GTT responses was compared by unpaired t-test for 25 vs 12 weeks post-transplant (Fig 3E, F). Glucose-stimulated human C-peptide secretion was assessed by 1-way repeated measures ANOVA with SNK post-hoc test (Fig 3H, J). Endogenous pancreatic  $\beta$ -cell area was compared by 1-way ANOVA with SNK post-hoc test (Supplementary Fig 8C).

**Supplementary Table 1.** Teratomous elements identified within engrafted hESC-derived tissue.

| <b>Cohort</b> | <b>Animal #</b> | <b>Graft Stage</b> | <b>Teratomous Elements</b>                   |
|---------------|-----------------|--------------------|----------------------------------------------|
| 1             | 4               | 6 months           | Immature teratoma                            |
|               | 5               | 8 months           | Mature bone and cartilage                    |
|               | 11              | 8 months           | None                                         |
|               | 12              | 8 months           | Mature bone and cartilage                    |
|               | 14              | 8 months           | None                                         |
|               | 15              | 8 months           | None                                         |
| 2             | 4               | 1 month            | None                                         |
|               | 9               | 1 month            | Focal mature cartilage                       |
|               | 28              | 1 month            | None                                         |
|               | 24              | 1 month            | None                                         |
|               | 29              | 3 months           | None                                         |
|               | 2               | 3 months           | None                                         |
|               | 20              | 3 months           | Bone marrow                                  |
|               | 27              | 3 months           | None                                         |
|               | 5               | 8 months           | Focal mature cartilage                       |
|               | 10              | 8 months           | Mature bone                                  |
|               | 30              | 8 months           | Mature bone                                  |
|               | 13              | 8 months           | None                                         |
| 3             | 31              | 17 weeks           | Mature bone, mesenchyme and glandular tissue |
|               | 34              | 17 weeks           | None                                         |

SUPPLEMENTARY DATA

**Supplementary Table 2.** Details of antibodies used for high content image analysis of *in vitro* cultures.

| PRIMARY ANTIBODY |        |          |                    |          |              | SECONDARY ANTIBODY |                    |          |                  |                          |
|------------------|--------|----------|--------------------|----------|--------------|--------------------|--------------------|----------|------------------|--------------------------|
| Antigen          | HOST   | Dilution | Manufacturer       | Cat. No. | Block        | 2° Antibody        |                    | Dilution | Manufacturer     | Cat. No.                 |
| PDX1             | rabbit | 1:750    | AbCam              | ab47267  | 5.0% Donkey  | Alexa Fluor-       | donkey-anti-rabbit | 1:500    | Molecular Probes | 488-A21206               |
| PDX1             | goat   | 1:50     | Santa Cruz         | SC-14664 | 4.0% Chicken | Alexa Fluor-       | chicken-anti-goat  | 1:100    | Molecular Probes | 488-A21467<br>647-A21469 |
| NKX6.1           | mouse  | 1:500    | University of Iowa | F55A12   | 5.0% Donkey  | Alexa Fluor-       | donkey-anti-mouse  | 1:500    | Molecular Probes | 488-A21202<br>647-A31571 |
| NKX6.1           | rabbit | 1:250    | LifeSpan           |          | 5.0% Donkey  | Alexa Fluor-       | donkey-anti-rabbit | 1:250    | Molecular Probes | 488-A21206<br>647-A31573 |
| CDX2             | mouse  | 1:500    | Invitrogen         | 39-7800  | 5.0% Donkey  | Alexa Fluor-       | donkey-anti-mouse  | 1:250    | Molecular Probes | 647-A31571               |
| NEURO D1         | goat   | 1:250    | R&D                | AF2746   | 5.0% Donkey  | Alexa Fluor-       | donkey-anti-goat   | 1:250    | Molecular Probes | 647-A21447               |
| hISLET 1         | mouse  | 1:500    | Abcam              | Ab86472  | 5.0% Donkey  | Alexa Fluor-       | donkey-anti-mouse  | 1:500    | Molecular Probes | 488-A21202<br>647-A31571 |
| NKX2.2           | goat   | 1:250    | Santa Cruz         | sc15015  | 5.0% Donkey  | Alexa Fluor-       | donkey-anti-goat   | 1:250    | Molecular Probes | 647-A21447               |

SUPPLEMENTARY DATA

**Supplementary Table 3.** Applied Biosystems qRT-PCR primers.

| <b>Category</b>                | <b>GENE NAME</b> | <b>CATALOGUE NUMBER</b> |
|--------------------------------|------------------|-------------------------|
| Endocrine Markers              | <i>CHGA</i>      | Hs00154441_m1           |
|                                | <i>INS</i>       | Hs00355773_m1           |
|                                | <i>GCG</i>       | Hs00174967_m1           |
|                                | <i>SST</i>       | Hs00175082_m1           |
|                                | <i>IAPP</i>      | Hs00356144_m1           |
| Pancreas Transcription Factors | <i>ARX</i>       | Hs00292465_m1           |
|                                | <i>HNF4a</i>     | Hs00604435_m1           |
|                                | <i>ISL1</i>      | Hs00158126_m1           |
|                                | <i>MAFB</i>      | Hs00534343_s1           |
|                                | <i>NEUROD1</i>   | Hs00159598_m1           |
|                                | <i>NGN3</i>      | Hs00360700_g1           |
|                                | <i>NKX6.1</i>    | Hs00232355_m1           |
|                                | <i>NKX2.2</i>    | Hs00159616_m1           |
|                                | <i>PAX4</i>      | Hs00173014_m1           |
|                                | <i>PAX6</i>      | Hs00240871_m1           |
|                                | <i>PDX1</i>      | Hs00236830_m1           |
|                                | <i>PTF1a</i>     | Hs00603586_g1           |
| Non-pancreatic Lineage Markers | <i>AFP</i>       | Hs00173490_m1           |
|                                | <i>ALB</i>       | Hs00609411_m1           |
|                                | <i>CDX1</i>      | Hs00230919_m1           |
|                                | <i>HAND1</i>     | Hs00231848_m1           |
|                                | <i>MUC1</i>      | Hs00159357_m1           |
|                                | <i>NKX2.1</i>    | Hs00163037_m1           |
|                                | <i>PECAM</i>     | Hs00169777_m1           |
|                                | <i>POU5F1</i>    | Hs01895061_u1           |
| Pluripotency Markers           | <i>ZIC1</i>      | Hs00602749_m1           |
|                                | <i>NANOG</i>     | Hs02387400_g1           |
|                                | <i>OCT4</i>      | Hs01895061_u1           |
|                                | <i>TDGF1</i>     | Hs02339499_g1           |
|                                | <i>ZFP42</i>     | Hs00399279_m1           |

SUPPLEMENTARY DATA

**Supplementary Table 4.** SABiosciences qRT-PCR primers.

| <b>GENE CATEGORY</b>  | <b>GENE NAME</b>                     | <b>OFFICIAL FULL NAME</b>                                           | <b>GenBank #</b> |
|-----------------------|--------------------------------------|---------------------------------------------------------------------|------------------|
| Pancreas Hormones     | <i>INS</i>                           | Insulin                                                             | NM_000207        |
|                       | <i>IAPP</i>                          | Islet amyloid polypeptide                                           | NM_000415        |
|                       | <i>GCG</i>                           | Glucagon                                                            | NM_002054        |
|                       | <i>PPY</i>                           | Pancreatic polypeptide                                              | NM_002722        |
|                       | <i>SST</i>                           | Somatostatin                                                        | NM_001048        |
|                       | <i>GHRL</i>                          | Ghrelin/obestatinpreprohormone                                      | NM_016362        |
| Transcription Factors | <i>ARX</i>                           | Aristaless related homeobox                                         | NM_139058        |
|                       | <i>FOXO1</i>                         | Forkhead box O1                                                     | NM_002015        |
|                       | <i>ISL1</i>                          | ISL LIM homeobox 1                                                  | NM_002202        |
|                       | <i>MAFA</i>                          | V-mafmusculoaponeuroticfibrosarcoma oncogene homolog A (avian)      | NM_201589        |
|                       | <i>MAFB</i>                          | V-mafmusculoaponeuroticfibrosarcoma oncogene homolog B (avian)      | NM_005461        |
|                       | <i>NEUROD1</i>                       | Neurogenic differentiation 1                                        | NM_002500        |
|                       | <i>NEUROG3</i>                       | Neurogenin 3                                                        | NM_020999        |
|                       | <i>NKX2.2</i>                        | NK2 homeobox 2                                                      | NM_002509        |
|                       | <i>NKX6.1</i>                        | NK6 homeobox 1                                                      | NM_006168        |
|                       | <i>PAX4</i>                          | Paired box 4                                                        | NM_006193        |
|                       | <i>PAX6</i>                          | Paired box 6                                                        | NM_000280        |
|                       | <i>PDX1</i>                          | Pancreatic and duodenal homeobox 1                                  | NM_000209        |
|                       | <i>PTF1A</i>                         | Pancreas specific transcription factor, 1a                          | NM_178161        |
| <i>SOX9</i>           | SRY (sex determining region Y)-box 9 | NM_000346                                                           |                  |
| Maturation Markers    | <i>ABCC8</i> (SUR1)                  | ATP-binding cassette, sub-family C (CFTR/MRP), member 8             | NM_000352        |
|                       | <i>KCNJ11</i> (KIR6.2)               | Potassium inwardly-rectifying channel, subfamily J, member 11       | NM_000525        |
|                       | <i>GCK</i>                           | Glucokinase (hexokinase 4)                                          | NM_000162        |
|                       | <i>SLC2A1</i> (GLUT1)                | Solute carrier family 2 (facilitated glucose transporter), member 1 | NM_006516        |
|                       | <i>PCSK1</i>                         | Proproteinconvertasesubtilisin/kexin type 1                         | NM_000439        |
|                       | <i>PCSK2</i>                         | Proproteinconvertasesubtilisin/kexin type 2                         | NM_002594        |
|                       | <i>SLC30A8</i> (ZNT8)                | Solute carrier family 30 (zinc transporter), member 8               | NM_173851        |
| Other Tissues         | <i>RUNX2</i>                         | Runt-related transcription factor (BONE)                            | NM_004348        |
|                       | <i>PECAM</i>                         | Platelet/endothelial cell adhesion molecule (ENDOTHELIAL)           | NM_000442        |
|                       | <i>MYF5</i>                          | Myogenic factor 5 (MUSCLE)                                          | NM_005593        |
|                       | <i>MYOD1</i>                         | Myogenic differentiation 1 (MUSCLE)                                 | NM_002478        |
|                       | <i>ALB</i>                           | Albumin (Liver)                                                     | NM_000477        |
|                       | <i>CDX2</i>                          | Caudal type homeobox 2                                              | NM_001265        |

SUPPLEMENTARY DATA

|                    |               |                                                                 |           |
|--------------------|---------------|-----------------------------------------------------------------|-----------|
|                    | <i>OLIG2</i>  | Oligodendrocyte lineage transcription factor 2 (NEURAL)         | NM_005806 |
| Housekeeping Genes | <i>B2M</i>    | Beta-2-microglobulin                                            | NM_004048 |
|                    | <i>HPRT1</i>  | Hypoxanthine phosphoribosyltransferase 1 (Lesch-Nyhan syndrome) | NM_000194 |
|                    | <i>RPL13A</i> | Ribosomal protein L13a                                          | NM_012423 |
|                    | <i>GAPDH</i>  | Glyceraldehyde-3-phosphate dehydrogenase                        | NM_002046 |
|                    | <i>ACTB</i>   | Actin, beta                                                     | NM_001101 |

**Supplementary Table 5.** Details of primary antibodies used for immunofluorescent staining.

| ANTIGEN                | SPECIES    | SOURCE                                                                  | DILUTION |
|------------------------|------------|-------------------------------------------------------------------------|----------|
| Amylase                | Rabbit     | Sigma Aldrich                                                           | 1:500    |
| ARX                    | Rabbit     | Dr. P Collombat, Inserm, University of Nice; Nice, France               | 1:500    |
| Chromogranin           | Sheep      | Enzo Life Sciences; Plymouth Meeting, PA                                | 1:200    |
| CK19                   | Mouse      | Dako; Denmark                                                           | 1:200    |
| C-Peptide              | Guinea Pig | AbCam                                                                   | 1:100    |
| Glucagon               | Mouse      | Sigma Aldrich                                                           | 1:1000   |
| Glucagon               | Rabbit     | Thermo Scientific; Waltham, MA                                          | 1:100    |
| IAPP (Amylin)          | Rabbit     | AbCam                                                                   | 1:200    |
| Insulin                | Guinea Pig | Millipore; Billerica, MA                                                | 1:1000   |
| Insulin                | Rabbit     | Cell Signaling Technologies, Danvers, MA                                | 1:100    |
| Pancreatic Polypeptide | Guinea Pig | Millipore                                                               | 1:500    |
| PC1/3                  | Rabbit     | Dr. Lakshmi Devi, Mount Sinai School of Medicine; New York, NY          | 1:500    |
| PC2                    | Rabbit     | ABR Affinity Bioreagents; Golden, CO                                    | 1:500    |
| PCNA                   | Mouse      | BD Transduction Laboratory; Franklin Lakes, NJ                          | 1:100    |
| PDX1                   | Rabbit     | Dr. Joel Habener, Harvard Medical School, Boston, MA                    | 1:1000   |
| MAFA                   | Rabbit     | Lifespan Biosciences; Seattle, WA                                       | 1:1000   |
| MAFB                   | Rabbit     | Sigma                                                                   | 1:500    |
| NKX2.2                 | Mouse      | Developmental Studies Hybridoma Bank; University of Iowa, Iowa City, IA | 1:100    |
| NKX6.1                 | Rabbit     | Lifespan Biosciences; Seattle, WA                                       | 1:4000   |
| Somatostatin           | Mouse      | GeneTex, Inc.; Irvine, CA                                               | 1:50     |
| Synaptophysin          | Rabbit     | Novus Biologicals; Littleton, CO                                        | 1:50     |
| Trypsin                | Sheep      | R&D Systems; Minneapolis, MN                                            | 1:100    |
| Zinc Transporter 8     | Mouse      | Mellitech; Grenoble, France                                             | 1:200    |



SUPPLEMENTARY DATA

**Supplementary Figure 1.** Optimization of the *in vitro* differentiation protocol (related to Figure 1A). Gene expression of pancreatic endocrine lineage (*PDX1*, *NeuroD*, *NKX6.1*, *NGN3* and *HNF4 $\alpha$* ) and intestinal lineage (*CDX2*) markers to assess the optimal basal media formulation during stage 4. Data are presented as mean  $\pm$  SD.

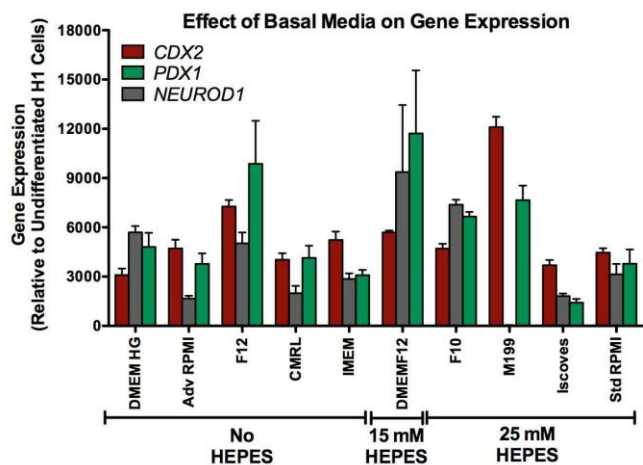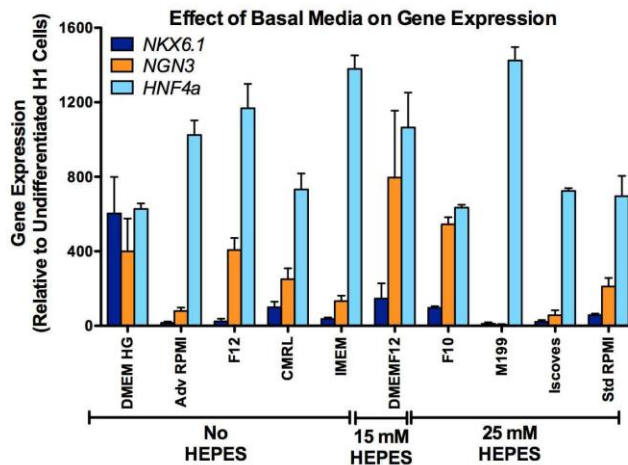

SUPPLEMENTARY DATA

**Supplementary Figure 2.** High content image quantification (*related to Figure 2F*). A - F) Representative images of high content quantification for various combinations of markers in monolayer cultures at stage 4, days 4-5. Panel D shows that the majority of cells express either NKX2.2 or NKX6.1, but that rare cells co-express both transcription factors.

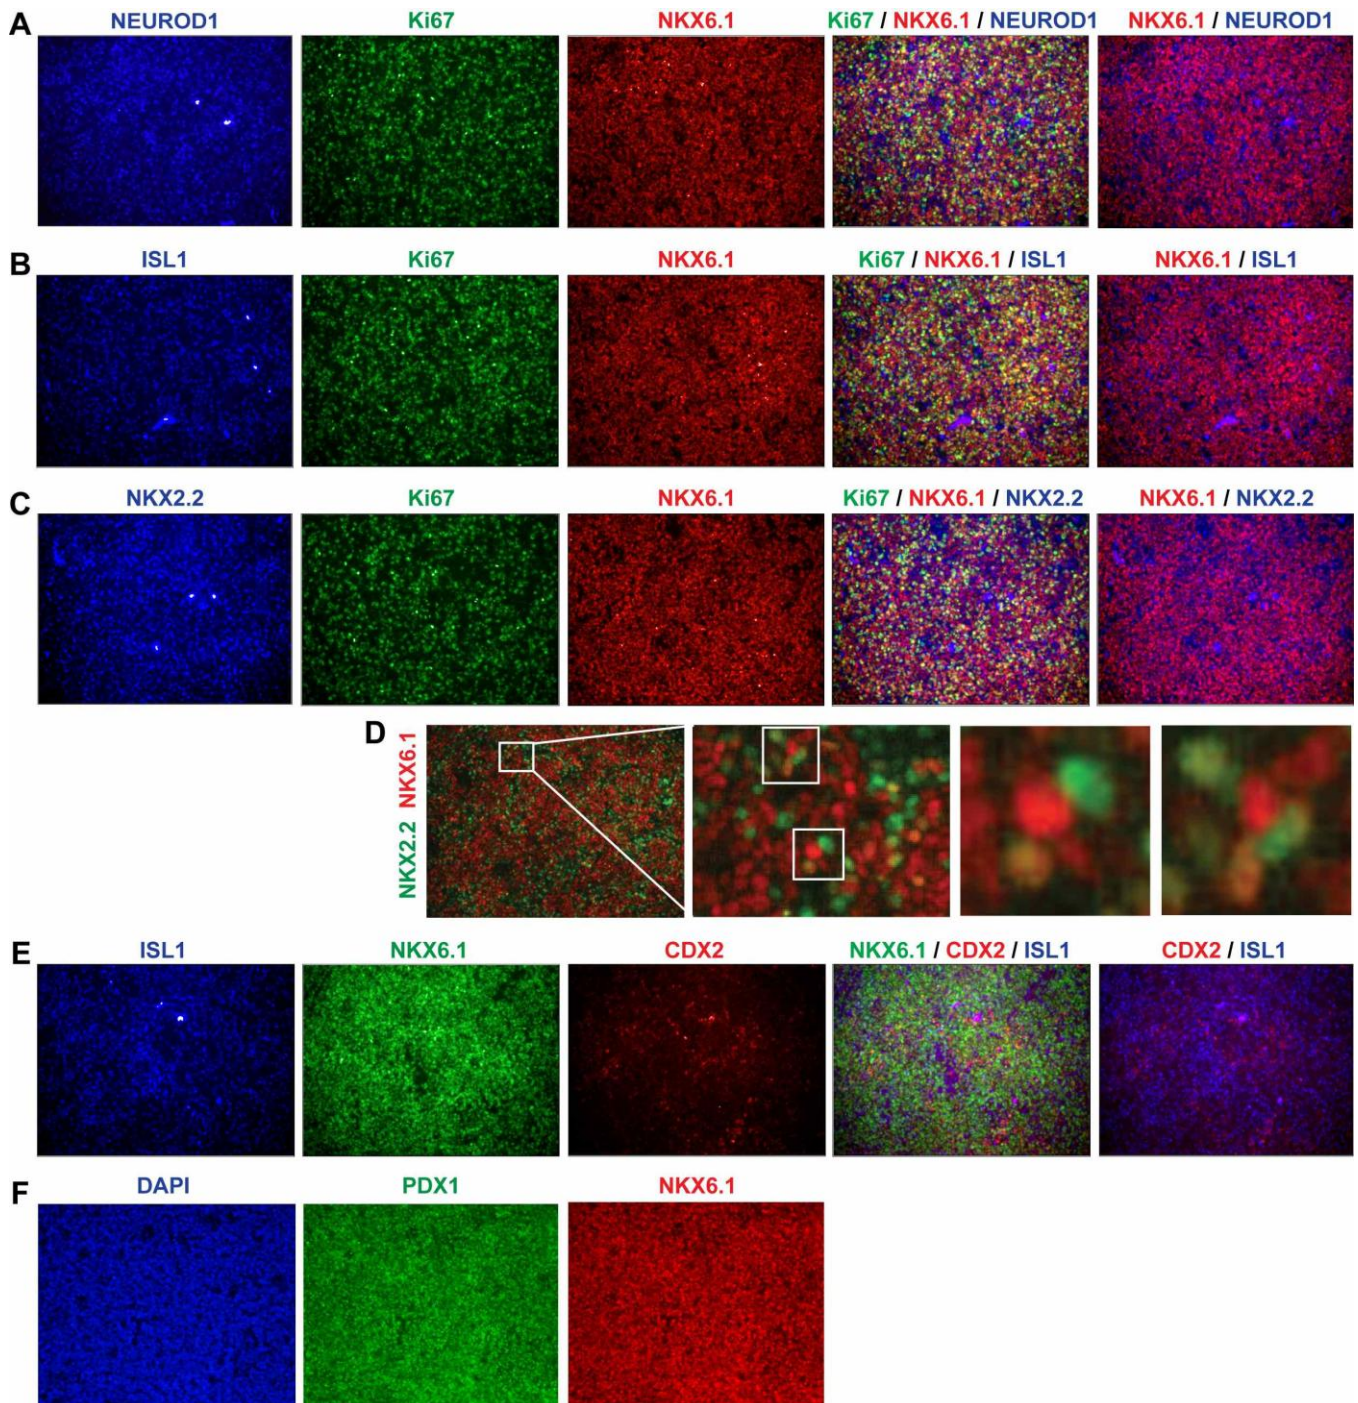

SUPPLEMENTARY DATA

**Supplementary Figure 3.** PDX1 and NKX6.1 co-expression in stage 4 suspension clusters (*related to Figure 2*). Representative immunofluorescent staining for PDX1 (green) and NKX6.1 (red) with or without DAPI (blue). Magnified islets illustrate the heterogeneity in co-expression of PDX1 and NKX6.1.

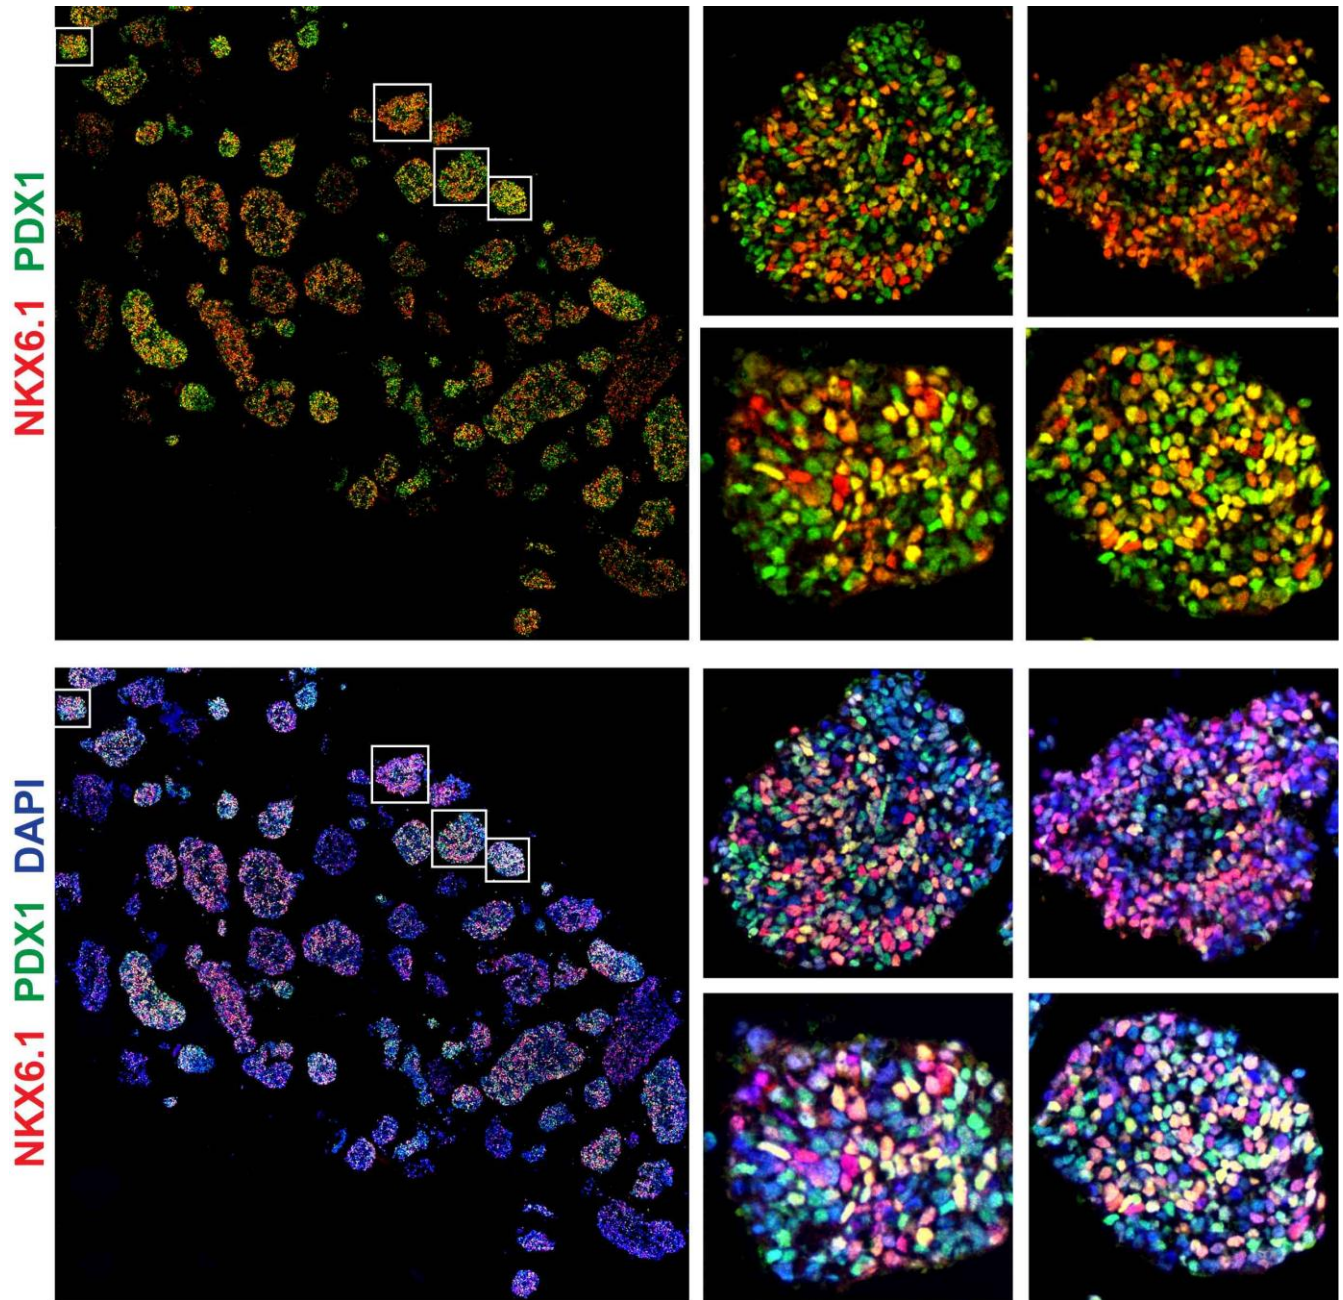

SUPPLEMENTARY DATA

**Supplementary Figure 4.** hESC expansion during *in vitro* and *in vivo* differentiation (related to Figures 2 and 4). A) Proportion of cells expressing Ki67 (proliferation marker) and B) number of cells/cm<sup>2</sup> throughout the *in vitro* differentiation. C) Gene expression of pluripotency markers in S4 cells and adult human islets relative to undifferentiated H1 cells. Data are presented as mean ± SEM. D) Representative images of insulin, glucagon and PCNA (proliferating cell nuclear antigen) expression in engrafted cells at 1, 4 and 8 months following transplantation under the kidney capsule. Scale bars = 50 μm.

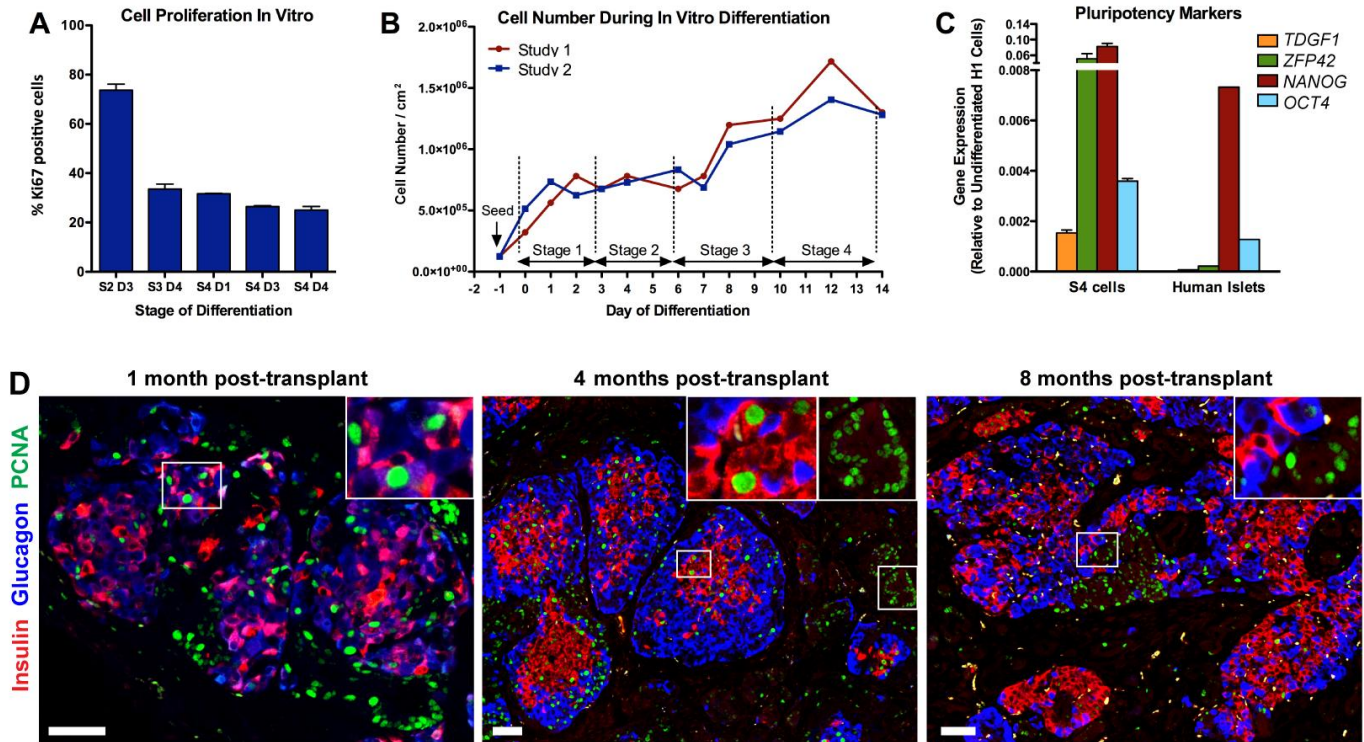

SUPPLEMENTARY DATA

**Supplementary Figure 5.** Confirmation of the *in vitro* differentiation protocol efficiency in ESI-49 cells. A-B) qRT-PCR for expression of numerous genes, including pancreas hormones (blue bars), pancreas transcription factors (black bars) and other lineages (yellow bars) in differentiated stage 4, day 4-5 ESI-49 monolayer cultures (A) and suspension clusters (B). All data are expressed relative to levels in differentiated H1 cells at stage 4, day 4 (H1 cell levels indicated by dotted red line). C) FACS quantification of the proportion of cells expressing NKX6.1 (red), chromogranin (blue) or CDX2 (green) in differentiated monolayer and suspension cultures. D) Human C-peptide levels (ng/mL) in plasma of SCID-beige mice at 8, 10, 12 and 14 weeks following transplant of differentiated ESI-49 cells.

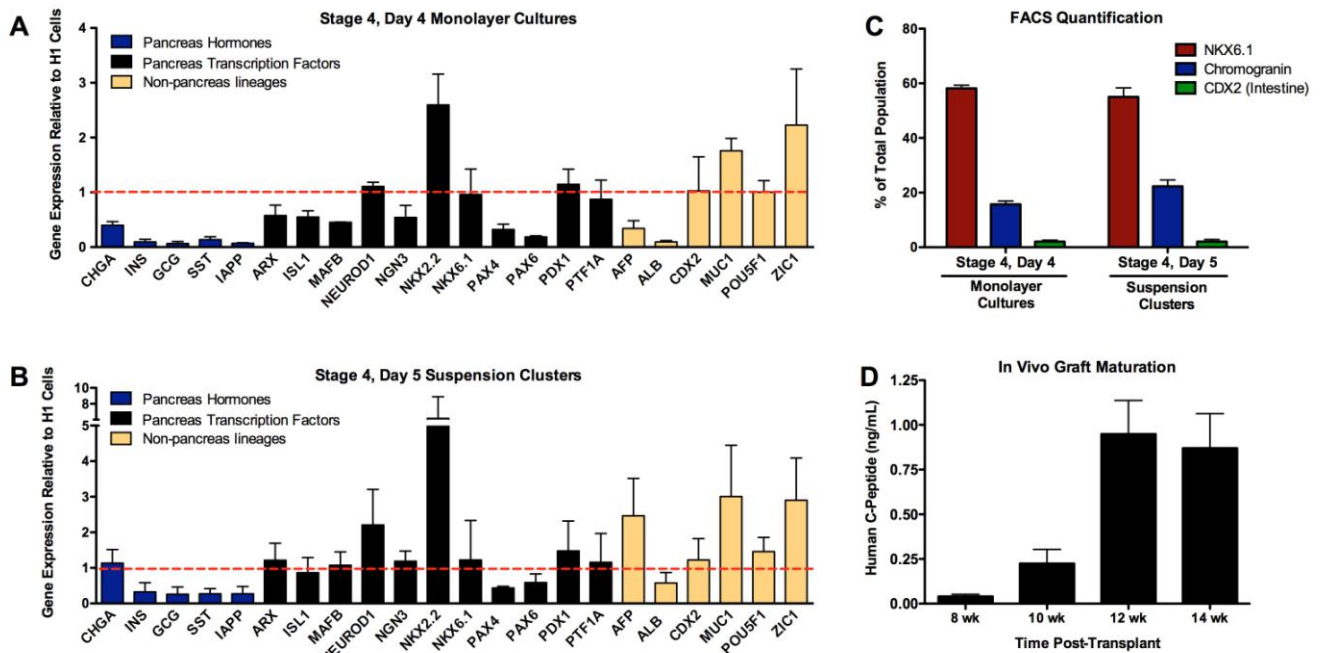

SUPPLEMENTARY DATA

**Supplementary Figure 6.** Human C-peptide levels in individual mice during various metabolic tests (related to Figure 3). Circulating human C-peptide (ng/mL) during: A) monthly meal challenges from cohorts 1 and 2, and B) random fed blood sampling from cohort 3. Human C-peptide levels at 0, 15, 30 and 60 minutes following an C) i.p. or D) oral glucose challenge (2 g/kg), expressed relative to basal levels. GTTs were performed in mice with engrafted hESCs at 32 and 34 weeks post-transplant and compared to mice with engrafted human islets.

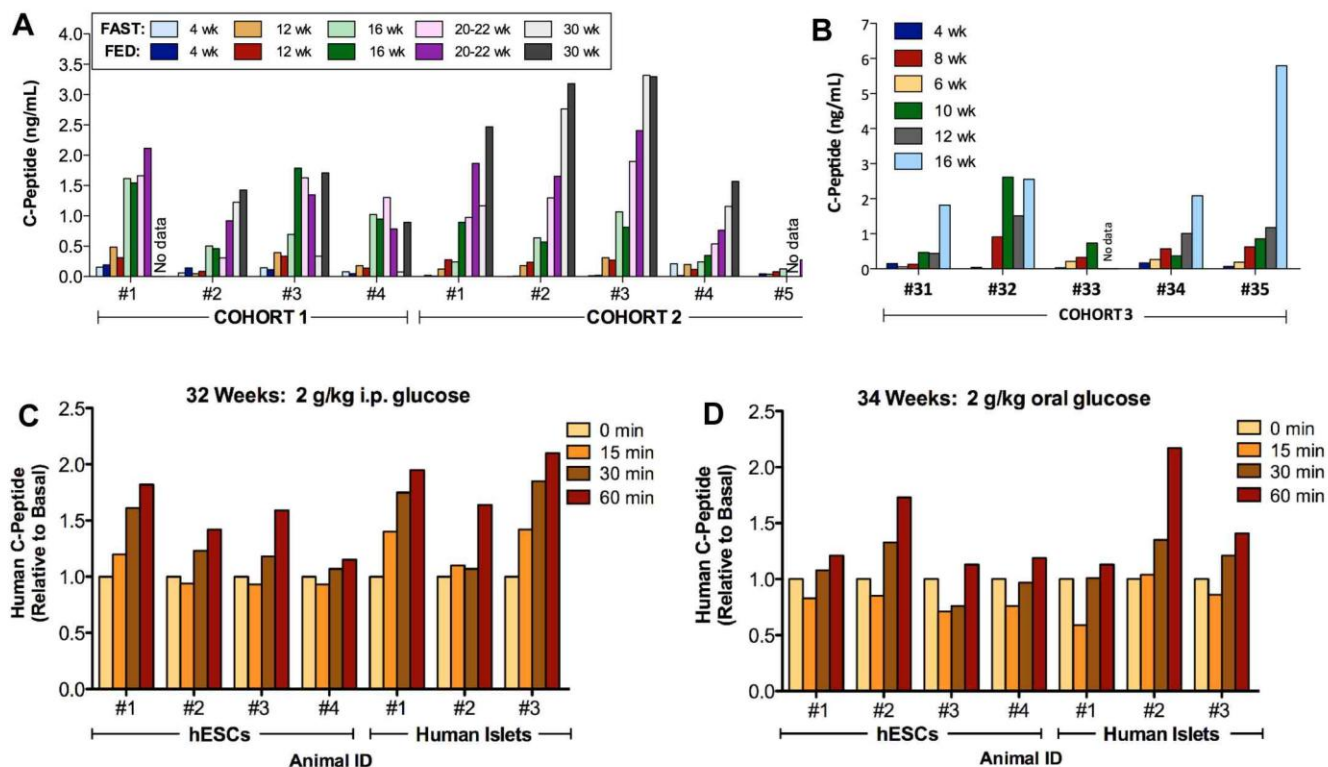

SUPPLEMENTARY DATA

**Supplementary Figure 7.** Maturation of hESC-derived progenitor cells in nude rats. A-B) Glucose-stimulated plasma human C-peptide levels (ng/mL) at various time points following transplantation of hESC-derived progenitor cells in nude rats from 2 independent cohorts. C) Blood glucose levels (mg/dL) and D) human C-peptide secretion following an intraperitoneal glucose tolerance test (ipGTT) at 14 weeks post-transplant in nude rats from Cohort #1. All data are presented as mean  $\pm$  SEM. E) Representative images of engrafted hESC-derived cells under the kidney capsule of nude rats in Cohort #2 showing insulin co-immunostaining with glucagon, somatostatin or NKX6.1.

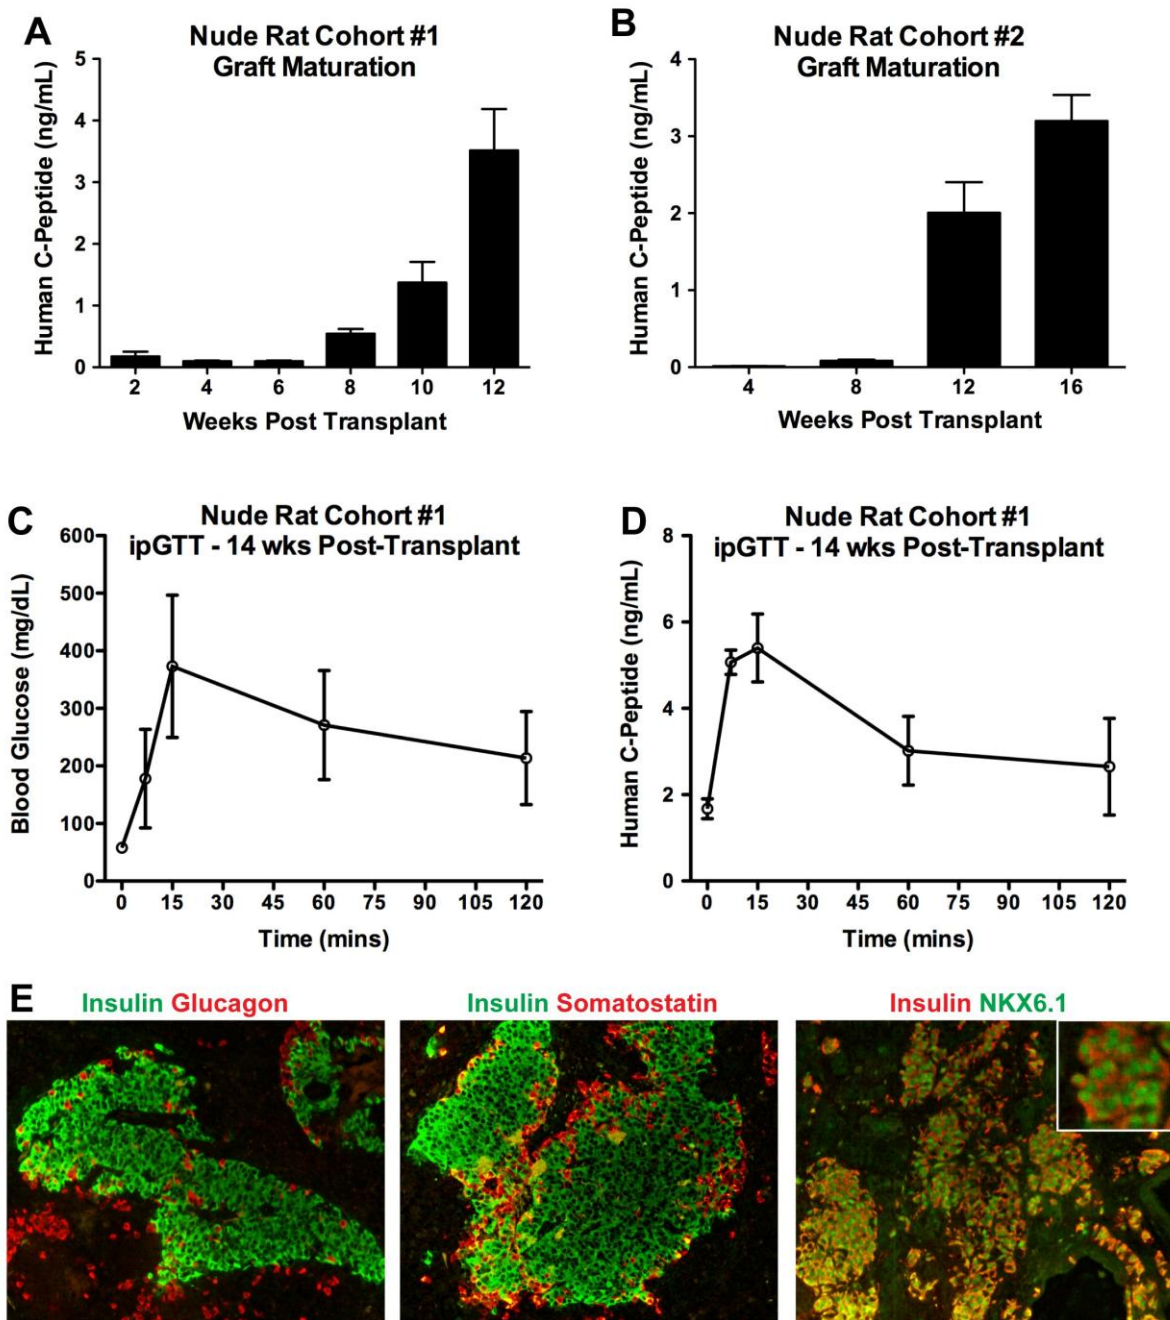

SUPPLEMENTARY DATA

**Supplementary Figure 8.** Contribution of the endogenous pancreas to glucose homeostasis (*related to Figure 3*). Human and mouse C-peptide levels (ng/mL) during: A) an oral GTT at 34 weeks post-transplant, and B) fast/re-feed challenges at 8 and 30 weeks post-transplant. Mice transplanted with hESC-derived cells were STZ-treated prior to transplant, but human islet recipients were not treated with STZ. ND = non-detectable. C) Quantification of relative  $\beta$ -cell area in the endogenous pancreas (insulin-positive area / total pancreas area) from healthy control mice (no STZ) and mice at 3 and 8 months post-STZ treatment. D-F) Representative images of whole pancreas sections (scale bar = 200  $\mu$ m) immunostained with insulin (red), glucagon (green) and DAPI (blue) from healthy controls (D) and mice at 3 (E) and 8 (F) months post-STZ; magnified islets are shown in the top right corner (scale bar = 100  $\mu$ m). All data are presented as mean  $\pm$  SEM. For the oral GTT (A): \*  $p < 0.05$ , 60 vs 15 min; \*\*  $p < 0.05$ , 60 vs 0, 15 and 30 mins (1-way ANOVA, repeated measures). For the fast/re-feed challenge (B): \*  $p < 0.05$ , 30 wk fast vs 30 wk fed (paired 2-tailed t-test). For  $\beta$ -cell area (C): \*  $p < 0.05$ , No STZ vs 3 and 8 months (1-way ANOVA), ns = not significant.

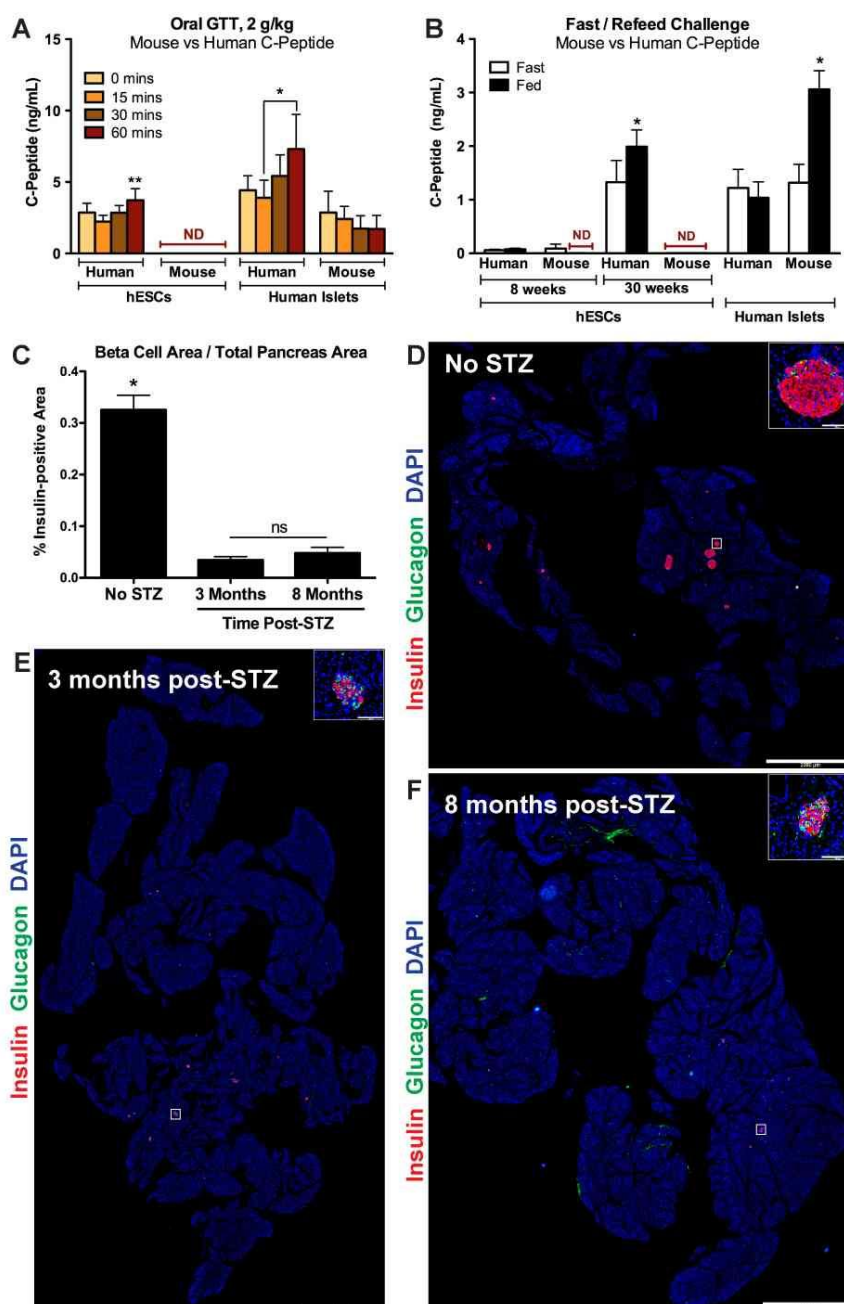



SUPPLEMENTARY DATA

**Supplementary Figure 9.** Graft composition at 8 months post-transplant. A – B) Gene expression of markers for various tissues, including bone, endothelial cells, muscle, neural, pancreas, liver and intestine in engrafted cells at 8 months post-transplant. Data are expressed relative to adult human islets and presented in panel A as mean  $\pm$  SEM and panel B as individual animals. Mouse #10 (red symbols) had confirmed presence of mature bone within the graft by pathology. Representative H&E images are provided for: C) a healthy graft containing only pancreas tissue (islets and ducts) and D) a graft containing pancreas tissue as well as a region of mature bone.

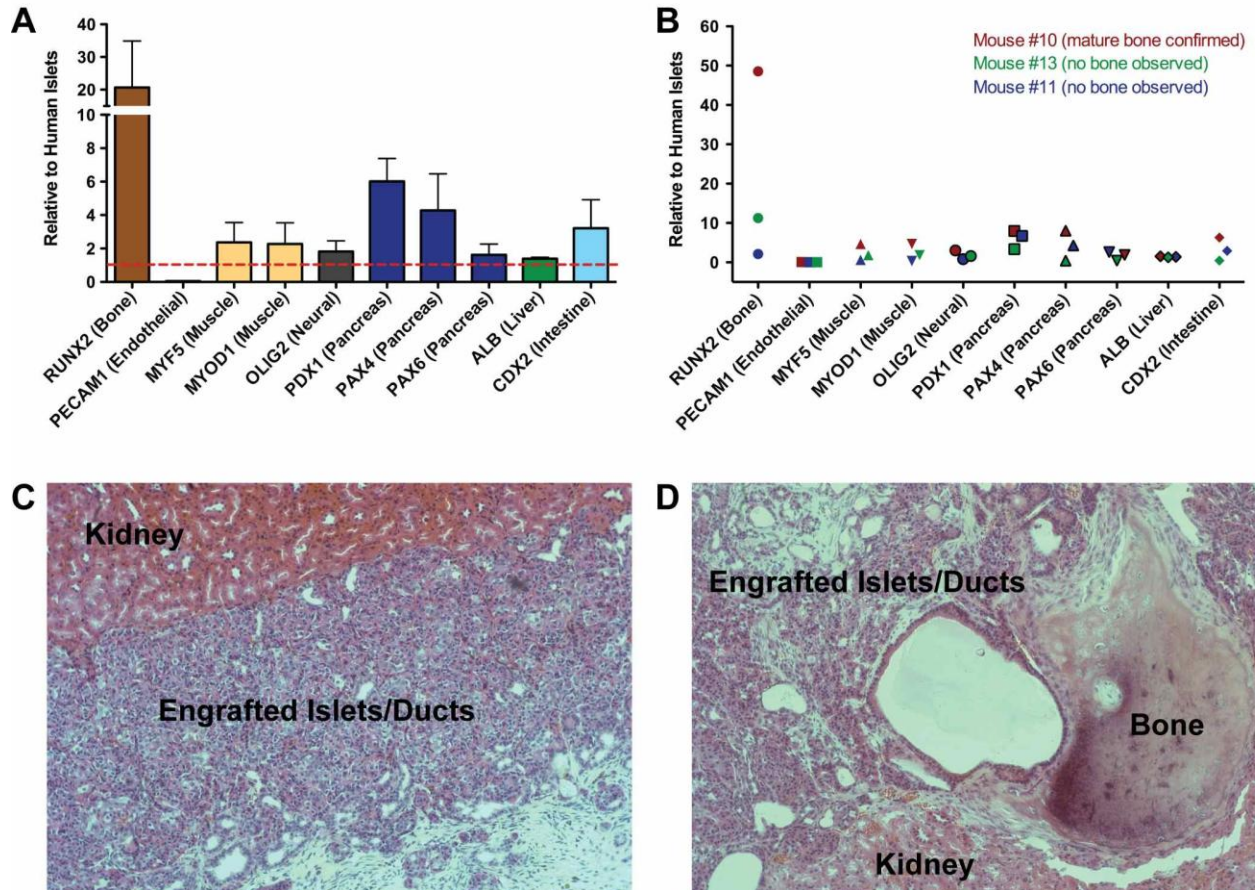

Supplement: supp_db11-1711_DB111711SupplementaryData.pdf [file supp_db11-1711_DB111711SupplementaryData.pdf]
